# Supplementary material for: Matrix Metalloproteinase-3 -1171 5A/6A Polymorphism (rs35068180) is Associated with Risk of Periodontitis
Source: PubMed Central journal article supplement (PMC4485030; doi:10.1038/srep11667), 2015-06-30
Supplement: srep11667-s1.pdf [file srep11667-s1.pdf]

**Matrix Metalloproteinase-3 -1171 5A/6A Polymorphism (rs35068180) is Associated with Risk of Periodontitis**

Cheng Ding<sup>1</sup>, Xing Chen<sup>1</sup>, Peng-tao Zhang<sup>1</sup>, Jin-ping Huang<sup>2</sup>, Yan Xu<sup>3</sup>, Ning Chen<sup>4,\*</sup> & Liang-jun Zhong<sup>1,5,\*</sup>

| Criteria items                                                                                                                                                                                                           | Score<br>(0 to 40)                                    |
|--------------------------------------------------------------------------------------------------------------------------------------------------------------------------------------------------------------------------|-------------------------------------------------------|
| <b><i>Title and Abstract</i></b>                                                                                                                                                                                         | <input type="checkbox"/> 0 <input type="checkbox"/> 1 |
| Title and Abstract: Indicate the study design (case-control or cohort study) in the title or the abstract                                                                                                                | <input type="checkbox"/> 0 <input type="checkbox"/> 1 |
| Abstract: Provide an informative and balanced summary of the study                                                                                                                                                       | <input type="checkbox"/> 0 <input type="checkbox"/> 1 |
| Introduction: Explain the scientific background and rationale for the investigation                                                                                                                                      | <input type="checkbox"/> 0 <input type="checkbox"/> 1 |
| Introduction: State specific objectives, including any prespecified hypotheses                                                                                                                                           | <input type="checkbox"/> 0 <input type="checkbox"/> 1 |
| <b><i>Methods</i></b>                                                                                                                                                                                                    | <input type="checkbox"/> 0 <input type="checkbox"/> 1 |
| Study Design: Present key elements of study design                                                                                                                                                                       | <input type="checkbox"/> 0 <input type="checkbox"/> 1 |
| Setting: Describe the setting, locations, and relevant dates, including periods of recruitment, exposure, follow-up, and data collection                                                                                 | <input type="checkbox"/> 0 <input type="checkbox"/> 1 |
| Participants: Give the eligibility criteria of case                                                                                                                                                                      | <input type="checkbox"/> 0 <input type="checkbox"/> 1 |
| Participants: Give the sources and methods of case ascertainment and control selection                                                                                                                                   | <input type="checkbox"/> 0 <input type="checkbox"/> 1 |
| Participants: Give matching criteria and the number of controls                                                                                                                                                          | <input type="checkbox"/> 0 <input type="checkbox"/> 1 |
| Variables: Clearly define all outcomes, exposures, predictors, potential confounders, effect modifiers                                                                                                                   | <input type="checkbox"/> 0 <input type="checkbox"/> 1 |
| Data sources/Measurement: Give sources of data and details of methods of assessment                                                                                                                                      | <input type="checkbox"/> 0 <input type="checkbox"/> 1 |
| Data sources/Measurement: Describe comparability of assessment methods                                                                                                                                                   | <input type="checkbox"/> 0 <input type="checkbox"/> 1 |
| Bias: Describe any efforts to address potential sources of bias                                                                                                                                                          | <input type="checkbox"/> 0 <input type="checkbox"/> 1 |
| Study size: Explain and describe the estimation of the study size                                                                                                                                                        | <input type="checkbox"/> 0 <input type="checkbox"/> 1 |
| Quantitative variables: Explain how quantitative variables were handled in the analyses                                                                                                                                  | <input type="checkbox"/> 0 <input type="checkbox"/> 1 |
| Quantitative variables: Give group included criteria in the analyses                                                                                                                                                     | <input type="checkbox"/> 0 <input type="checkbox"/> 1 |
| Statistical methods: Describe all statistical methods, including those used to control for confounding                                                                                                                   | <input type="checkbox"/> 0 <input type="checkbox"/> 1 |
| Statistical methods: Describe any methods used to examine subgroups and interactions                                                                                                                                     | <input type="checkbox"/> 0 <input type="checkbox"/> 1 |
| Statistical methods: Explain how missing data were addressed                                                                                                                                                             | <input type="checkbox"/> 0 <input type="checkbox"/> 1 |
| Statistical methods: Explain how matching of cases and controls was addressed                                                                                                                                            | <input type="checkbox"/> 0 <input type="checkbox"/> 1 |
| Statistical methods: Describe any sensitivity analyses                                                                                                                                                                   | <input type="checkbox"/> 0 <input type="checkbox"/> 1 |
| Hardy-Weinberg equilibrium: HWE was assessed                                                                                                                                                                             | <input type="checkbox"/> 0 <input type="checkbox"/> 1 |
| Hardy-Weinberg equilibrium: HWE of control group was assessed                                                                                                                                                            | <input type="checkbox"/> 0 <input type="checkbox"/> 1 |
| <b><i>Results</i></b>                                                                                                                                                                                                    |                                                       |
| Participants: Report the numbers of individuals at each stage of the study, such as numbers potentially eligible, examined for eligibility, confirmed eligible, included in the study, completing follow-up and analyzed | <input type="checkbox"/> 0 <input type="checkbox"/> 1 |
| Participants: Give reasons for non-participation at each stage                                                                                                                                                           | <input type="checkbox"/> 0 <input type="checkbox"/> 1 |
| Participants: Give a flow diagram                                                                                                                                                                                        | <input type="checkbox"/> 0 <input type="checkbox"/> 1 |
| Descriptive data: Give characteristics of study participants (e.g. demographic, clinical diagnosis, ethnicity, sex ratio, etc.)                                                                                          | <input type="checkbox"/> 0 <input type="checkbox"/> 1 |
| Descriptive data: Indicate the number of participants with missing data                                                                                                                                                  | <input type="checkbox"/> 0 <input type="checkbox"/> 1 |
| Outcome data: Report numbers in each exposure category, or summary measures of exposure                                                                                                                                  | <input type="checkbox"/> 0 <input type="checkbox"/> 1 |
| Main results: Give unadjusted estimates and confounder-adjusted estimates and their 95%                                                                                                                                  | <input type="checkbox"/> 0 <input type="checkbox"/> 1 |

|                                                                                                                                                                                            |                            |                            |
|--------------------------------------------------------------------------------------------------------------------------------------------------------------------------------------------|----------------------------|----------------------------|
| confidence intervals                                                                                                                                                                       |                            |                            |
| Main results: Make clear which confounders were adjusted for and why they were included                                                                                                    | <input type="checkbox"/> 0 | <input type="checkbox"/> 1 |
| Main results: If relevant, consider translating estimates of relative risk into absolute risk for a meaningful time period                                                                 | <input type="checkbox"/> 0 | <input type="checkbox"/> 1 |
| Other analyses: Report other analyses such subgroups, interactions, and sensitivity analyses                                                                                               | <input type="checkbox"/> 0 | <input type="checkbox"/> 1 |
| <b>Discussion</b>                                                                                                                                                                          | <input type="checkbox"/> 0 | <input type="checkbox"/> 1 |
| Key results: Summarize key results with reference to study objectives                                                                                                                      | <input type="checkbox"/> 0 | <input type="checkbox"/> 1 |
| Main results: Report category boundaries when continuous variables were categorized                                                                                                        | <input type="checkbox"/> 0 | <input type="checkbox"/> 1 |
| Limitations: Discuss both direction and magnitude of any potential bias                                                                                                                    | <input type="checkbox"/> 0 | <input type="checkbox"/> 1 |
| Interpretation: Give a cautious overall interpretation of results considering objectives, limitations, multiplicity of analyses, results from similar studies, and other relevant evidence | <input type="checkbox"/> 0 | <input type="checkbox"/> 1 |
| Generalizability: Discuss the generalizability (external validity) of the study results                                                                                                    | <input type="checkbox"/> 0 | <input type="checkbox"/> 1 |
| <b>Other</b>                                                                                                                                                                               | <input type="checkbox"/> 0 | <input type="checkbox"/> 1 |
| Funding: Give the source of funding and the role of the funders for the present study                                                                                                      | <input type="checkbox"/> 0 | <input type="checkbox"/> 1 |

---

**Supplementary Table S1.** The modified STROBE quality score systems.
